# Supplementary material for: Tröger's base-based copolymers with intrinsic microporosity for CO2 separation and effect of Tröger's base on separation performance
Source: Royal Society of Chemistry journal article supplement (doi:10.1039/c3py01608k), 2014-01-01
Supplement: c3py01608k.pdf [file c3py01608k.pdf]

**Supplementary Information for**  
**Tröger's Base-based Copolymers with Intrinsic Microporosity for**  
**CO<sub>2</sub> Separation and Effect of Tröger's Base on Separation**  
**Performance**

Zheng Gong Wang, Xia Liu, Dong Wang,\* and Jian Jin\*

i-LAB and Nano-bionics Division, Suzhou Institute of Nano-Tech & Nano-Bionics, Chinese  
Academy of Sciences, Suzhou, Jiangsu, 215123, China

E-mail: jjin2009@sinano.ac.cn; dwang2009@sinano.ac.cn.

## 1. NMR and mass spectroscopy of monomer (THTB)

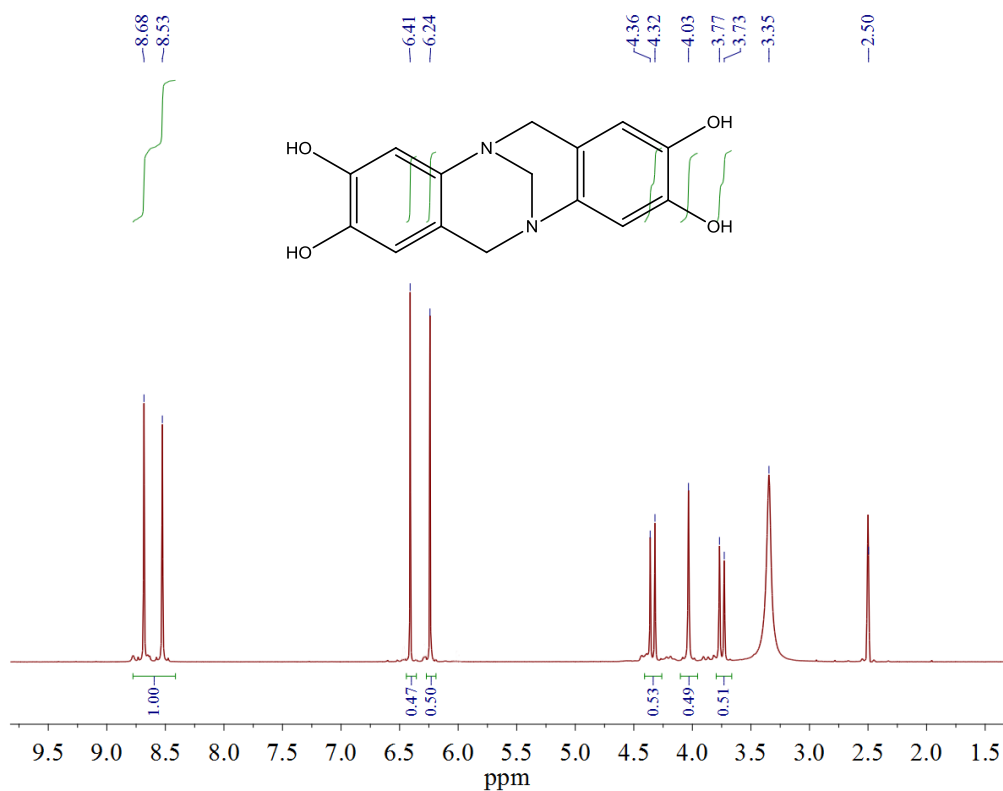

Figure S1. <sup>1</sup>H NMR of monomer THTB

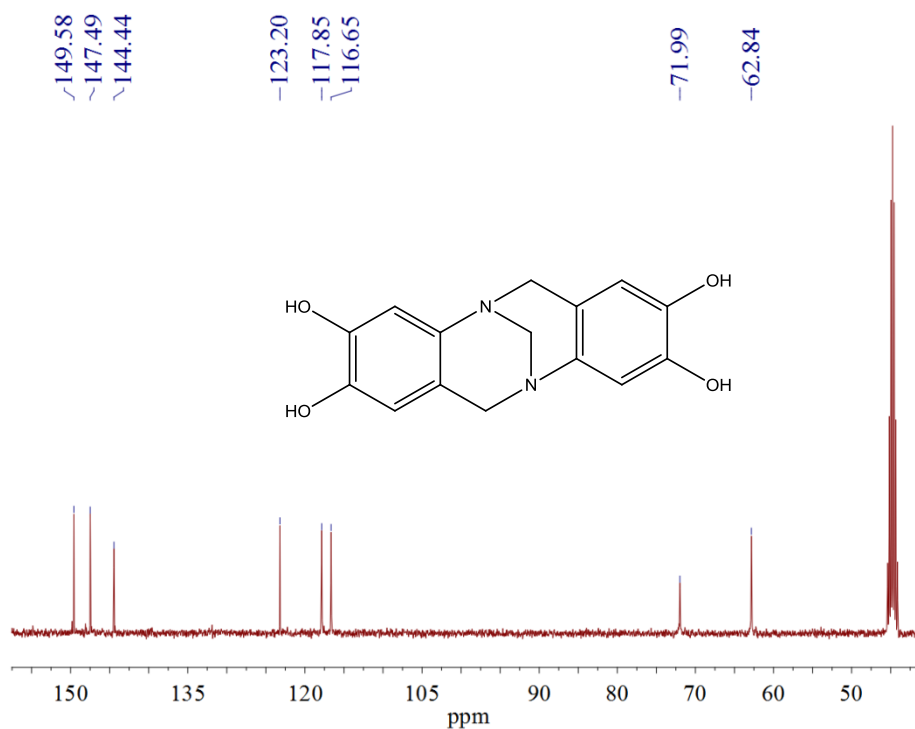

Figure S2. <sup>13</sup>C NMR of monomer THTB

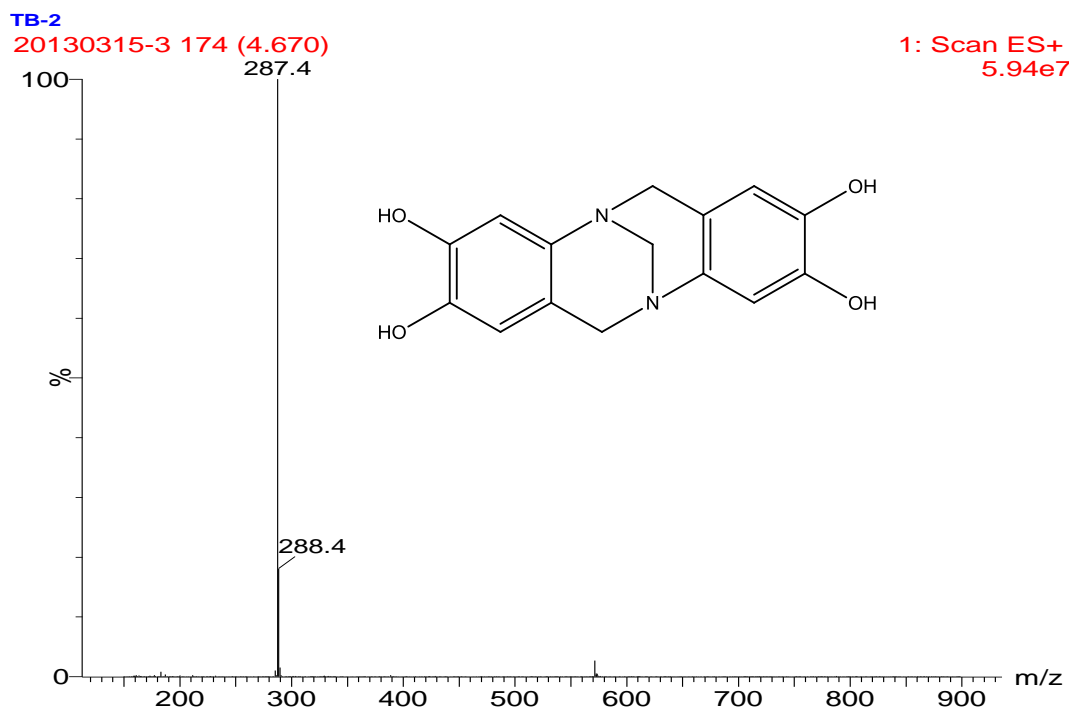

Figure S3. Mass spectroscopy of monomer THTB.

## 2. GPC result of PIM-1 and copolymers

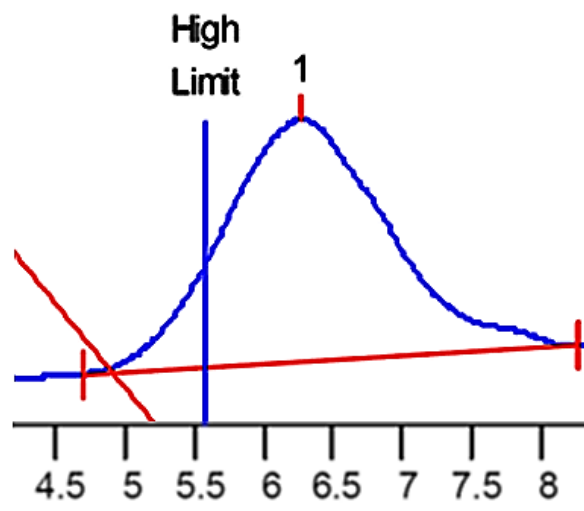

Figure S4. GPC result of PIM-1 (THF as eluent)

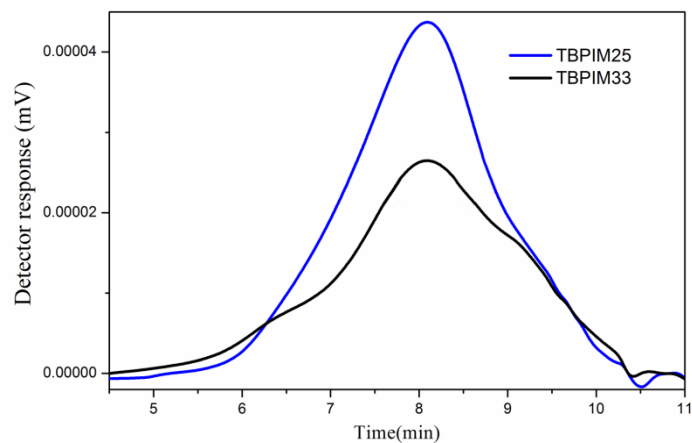

Figure S5. GPC result of TBPIM25 and TBPIM33 ( $\text{CHCl}_3$  as eluent)

### 3. Upper bound relationship of gas pair $\text{O}_2/\text{N}_2$

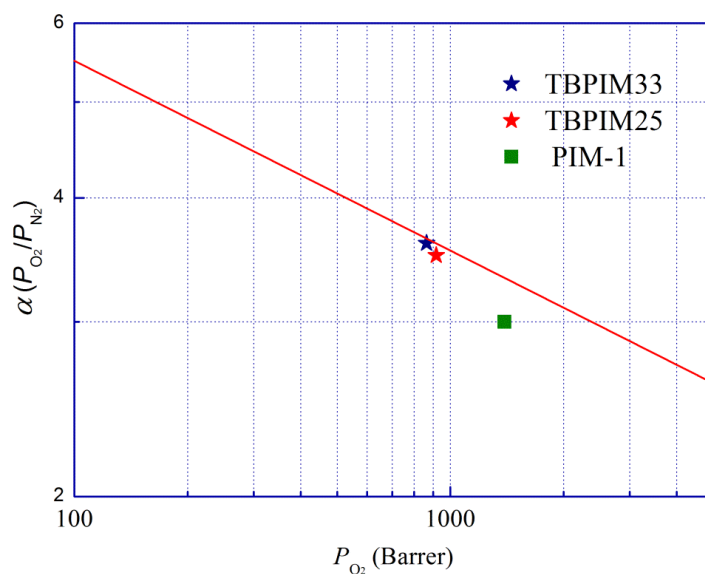

Figure S6. Robeson upper bound comparison of gas pair  $\text{O}_2/\text{N}_2$  (2008) of PIM-1, TBPIM25 and TBPIM33.
